# Supplementary material for: Multi-platform biomarkers of response to an immune checkpoint inhibitor in the neoadjuvant I-SPY 2 trial for early-stage breast cancer
Source: PubMed Central journal article supplement (PMC11604542; doi:10.1016/j.xcrm.2024.101799), 2024-11-06
Supplement: mmc1.pdf [file mmc1.pdf]

**Cell Reports Medicine, Volume 5**

**Supplemental information**

**Multi-platform biomarkers of response to an immune checkpoint inhibitor in the neoadjuvant I-SPY 2 trial  
for early-stage breast cancer**

**Michael J. Campbell, Denise M. Wolf, Christina Yau, Lamorna Brown-Swigart, Julie Wulfkuhle, Isela R. Gallagher, Zelos Zhu, Jennifer Bolen, Scott Vandenberg, Clifford Hoyt, Hidetoshi Mori, Alexander Borowsky, Laura Sit, Jane Perlmutter, Smita M. Asare, I-SPY2 Investigators, Rita Nanda, Minetta C. Liu, Douglas Yee, Angela M. DeMichele, Nola M. Hylton, Lajos Pusztai, Donald A. Berry, Gillian L. Hirst, Emanuel F. Petricoin, Laura van't Veer, and Laura Esserman**

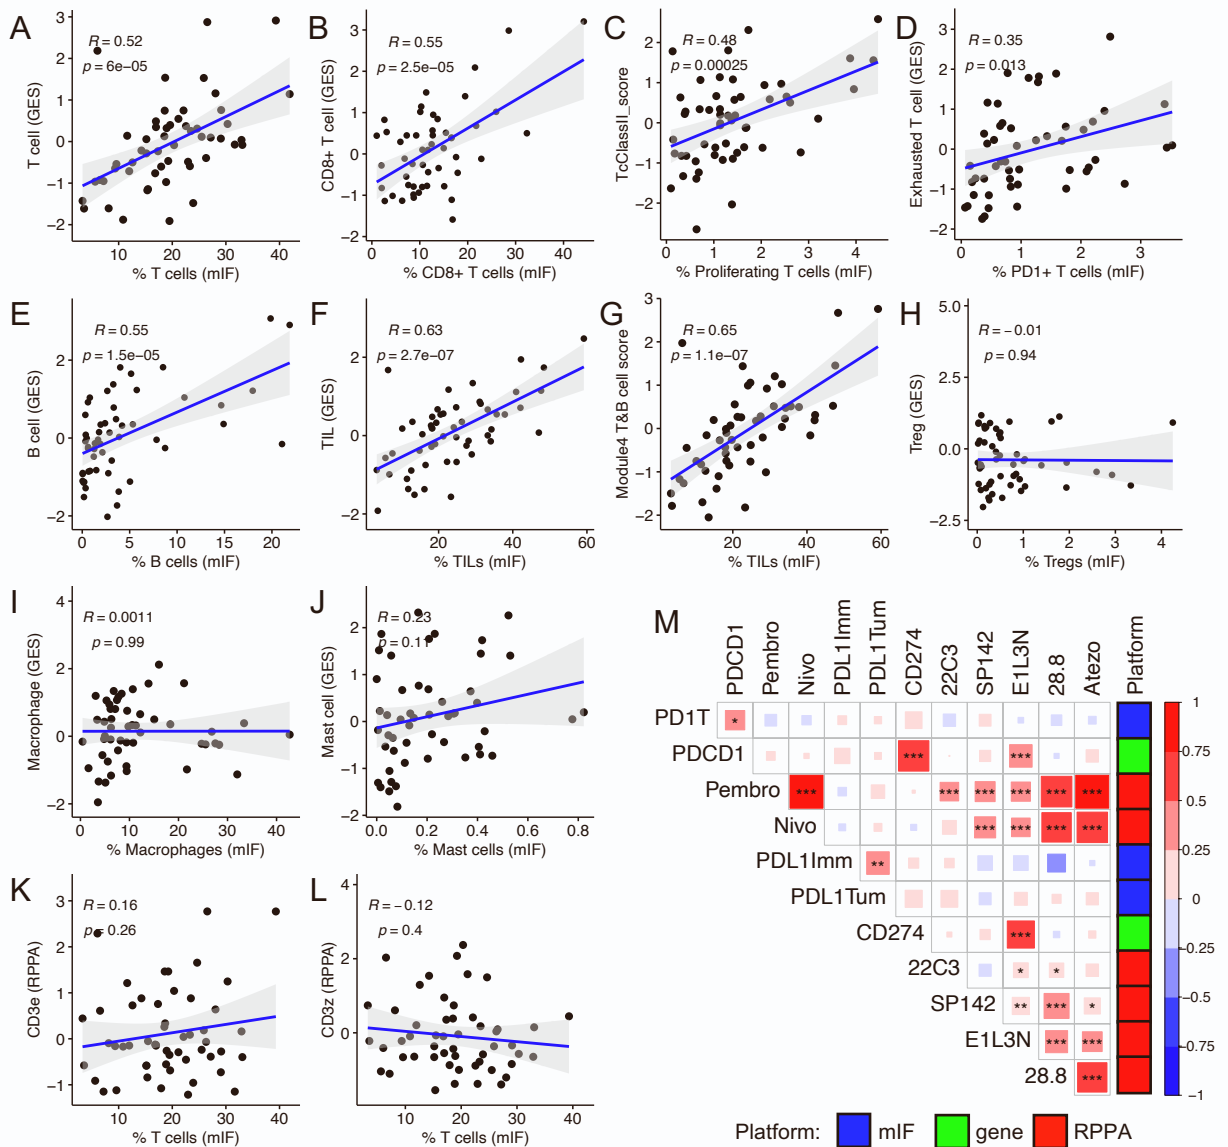

**Figure S1. Correlations of immune cell densities measured on different platforms. Related to Figure 1.** (A-J) Correlations of immune cells identified by mIF vs gene expression signatures (GES). (K-L) Correlations of immune cells identified by mIF vs RPPA. (M) Correlation matrix of PD-1/PD-L1 biomarkers. Pearson correlations; \* $p < 0.01$ , \*\* $p < 0.001$ , \*\*\* $p < 0.0001$ . Red square indicate positive correlation, blue squares indicate negative correlation. mIF markers --- PD1T: PD-1<sup>+</sup> T cells; PDL1Imm: PD-L1<sup>+</sup> immune cells; PDL1Tum: PD-L1<sup>+</sup> tumor cells. Gene expression markers --- PDCD1: PD-1 gene; CD274: PD-L1 gene. RPPA markers --- Pembro (pembrolizumab) and Nivo (nivolumab): anti-PD-1 mAbs; 22C3, SP142, E1L3N, 28.8 and Atezo (atezolizumab): anti-PD-L1 mAbs.

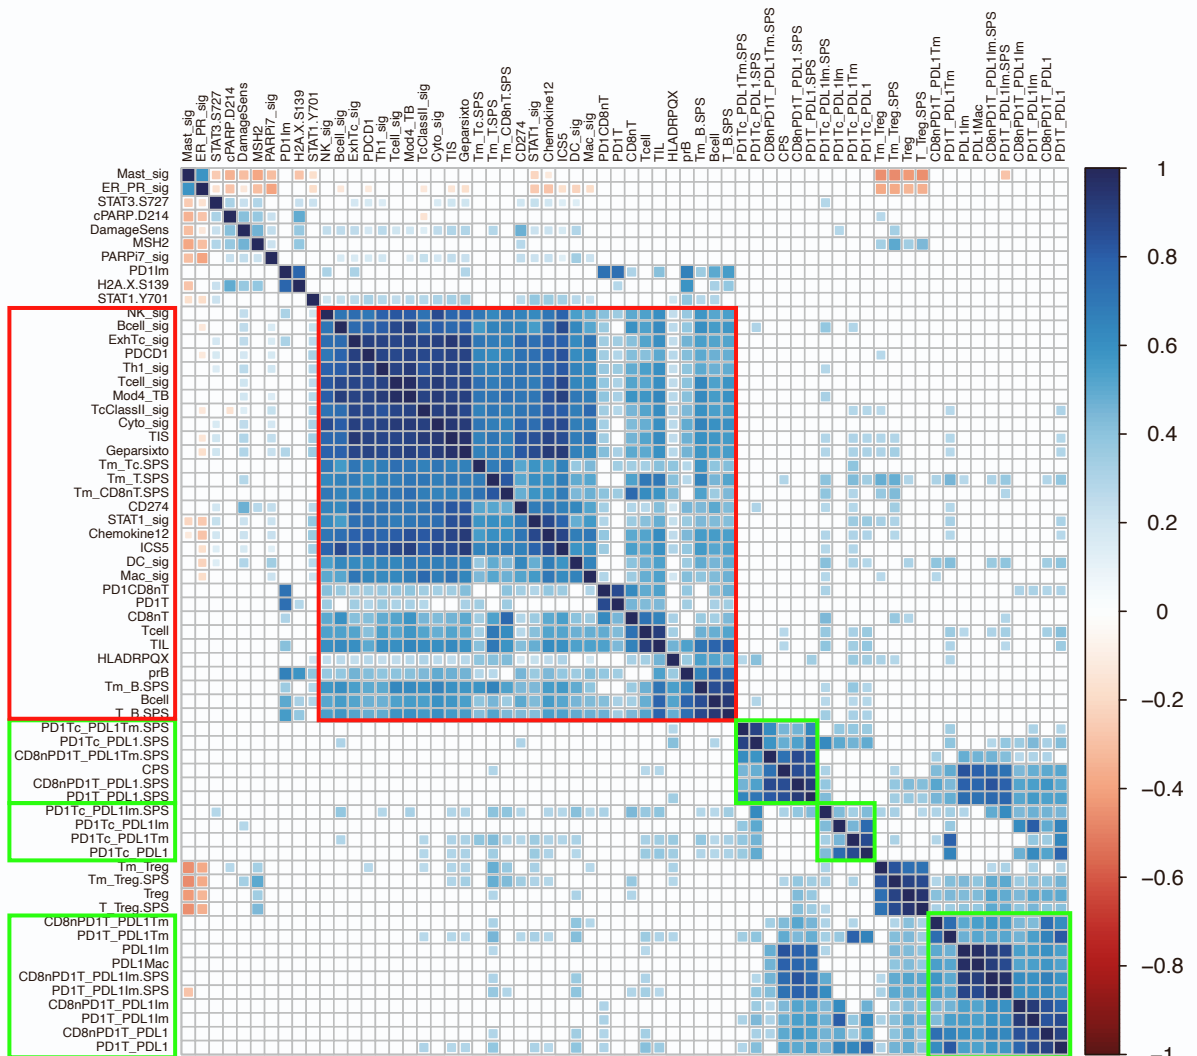

**Figure S2. Correlation matrix of biomarkers significantly associated with pCR in the pembro arm.** Related to Figures 3 and 6 and Tables S2-S6. Significant correlations (Pearson correlations,  $p < 0.05$ ) are shown in blue (positive correlation) or red (negative correlation). Red boxed area indicates cluster of immune cell gene expression signatures, immune cell densities by mIF, and immune cell population expression signatures. Green boxes indicate clusters of PD-1/PD-L1 related spatial metrics.

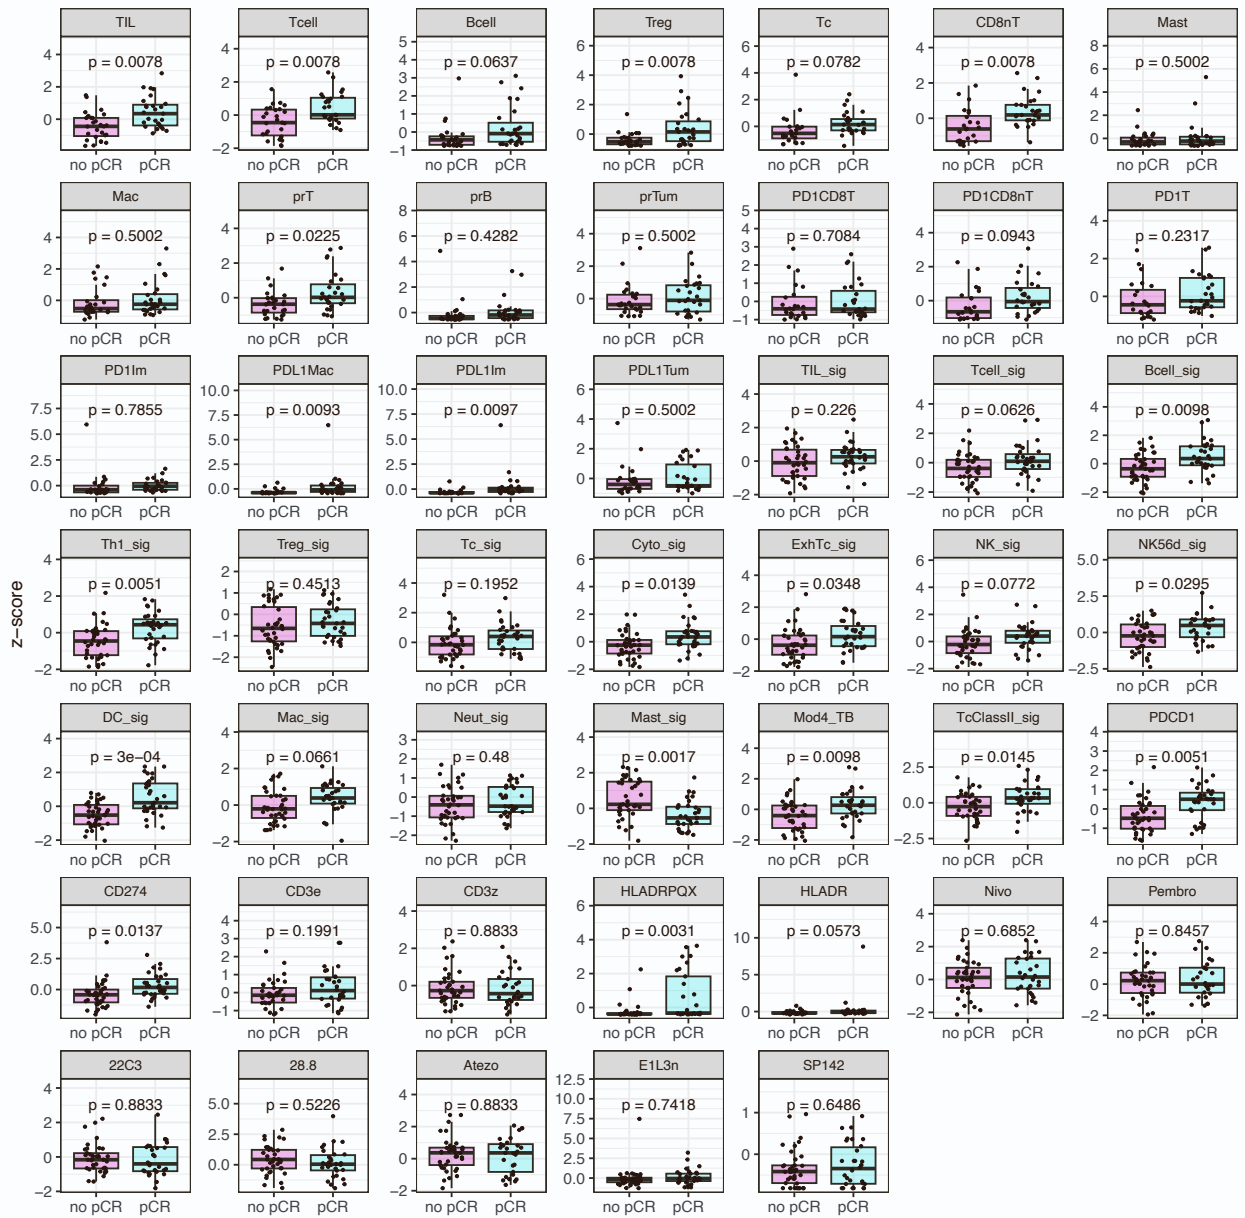

**Figure S3. Associations of immune cell markers/populations identified by mIF, gene expression, or RPPA with response to ICB. Related to Figure 3 and Tables S2-S6.** Boxplots illustrating the associations of immune cell densities (z-scored cell percentages), immune genes and gene signatures, and RPPA immune markers with response. Descriptions of mIF populations, gene signatures, and RPPA markers are given in Tables S2-S4. The data are depicted as individual dots for each sample, along with the median, first and third quartile. Statistical analysis was performed using the likelihood-ratio test. BH corrected p values shown.

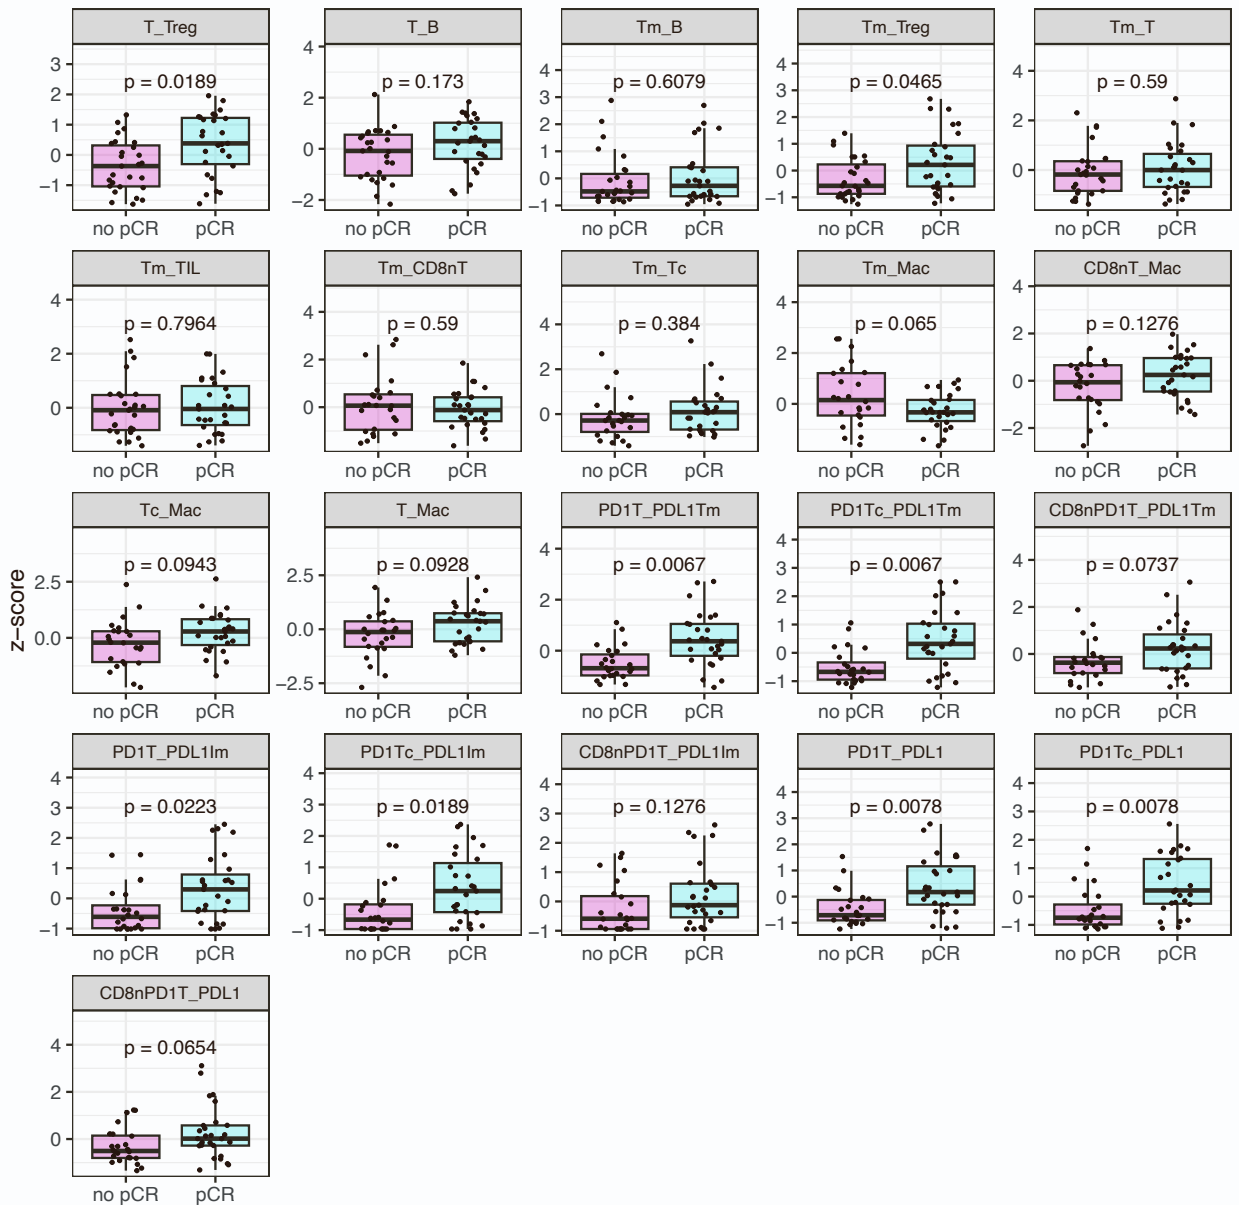

**Figure S4. Associations of spatial colocalization of various cell types in the tumor microenvironment with response to ICB. Related to Figure 4 and Tables S4 and S5.** Boxplots illustrating the associations of colocalization of cell pairs (Morisita-Horn indices; z-scored) with response. Descriptions of cell pairs are given in Table S4. The data are depicted as individual dots for each sample, along with the median, first and third quartile. Statistical analysis was performed using the likelihood-ratio test. BH corrected p values shown.

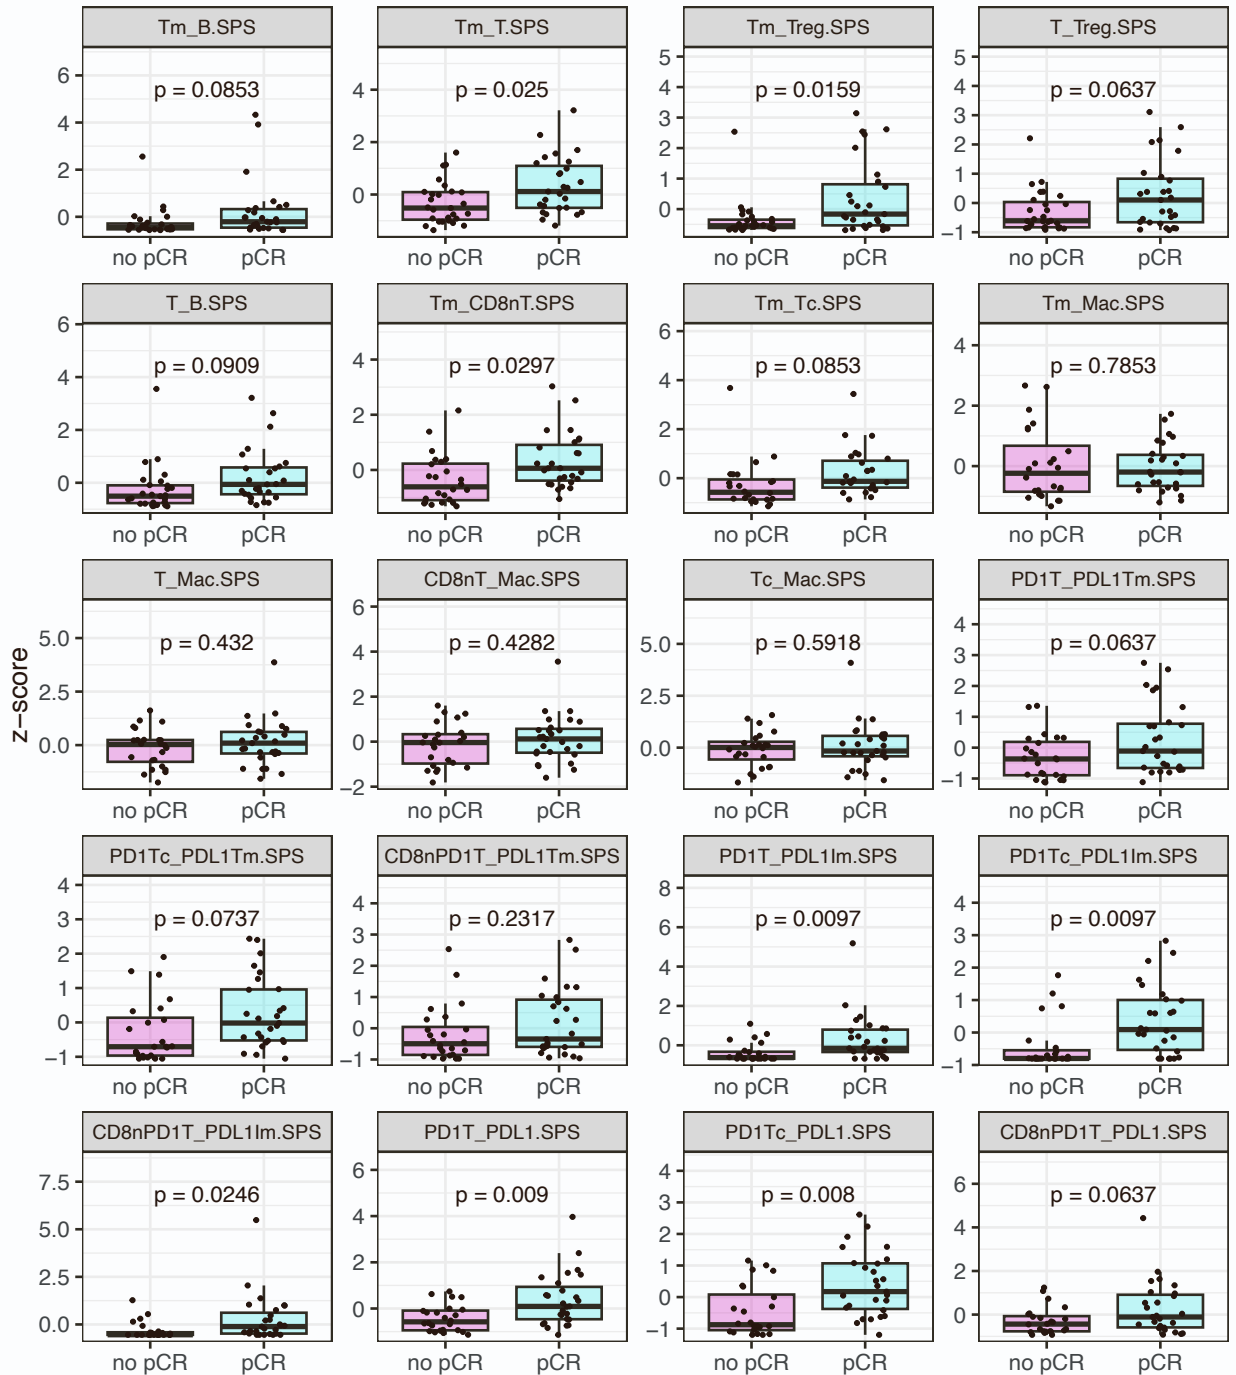

**Figure S5. Associations of spatial proximity of various cell types in the tumor microenvironment with response to ICB. Related to Figure 5 and Tables S4 and S5.** Boxplots illustrating the associations of spatial proximity scores (SPS) between cell pairs with response. Descriptions of cell pairs analyzed are given in Table S4. The data are depicted as individual dots for each sample, along with the median, first and third quartile. Statistical analysis was performed using the likelihood-ratio test. BH corrected p values shown.

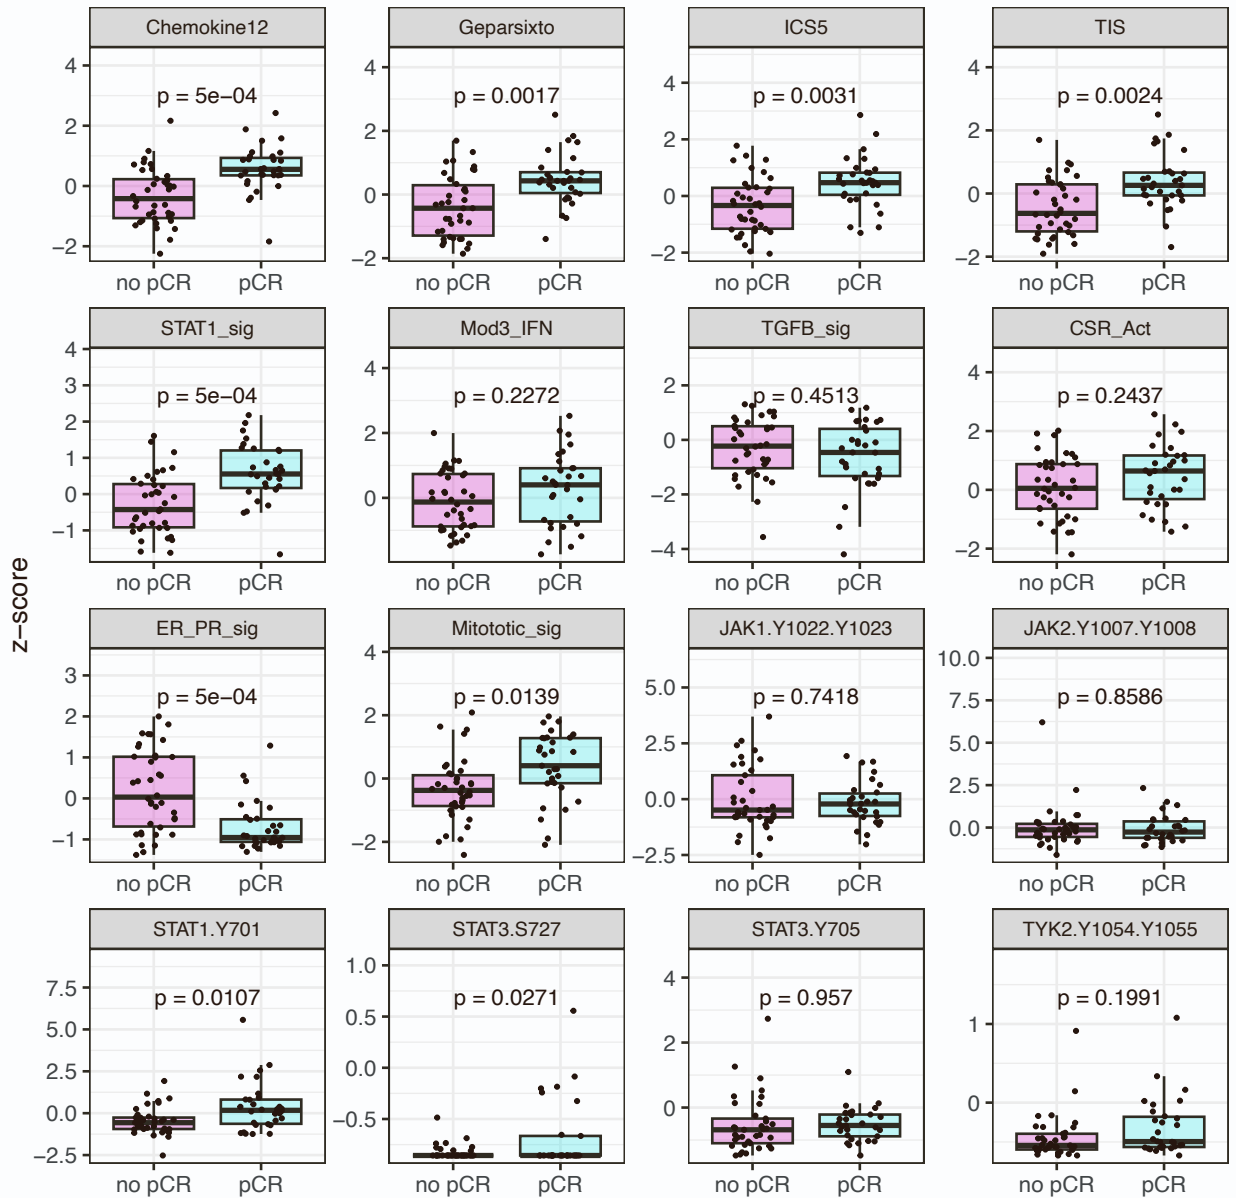

**Figure S6. Associations of immune signaling pathways with response to ICB. Related to Figure 6 and Tables S2, S3, and S6.** Boxplots illustrating the associations of signaling pathways measured by gene expression or RPPA with response. Descriptions of gene signatures are given in Table S2. Descriptions of RPPA markers are given in Table S3. The data are depicted as individual dots for each sample, along with the median, first and third quartile. Statistical analysis was performed using the likelihood-ratio test. BH corrected p values shown.

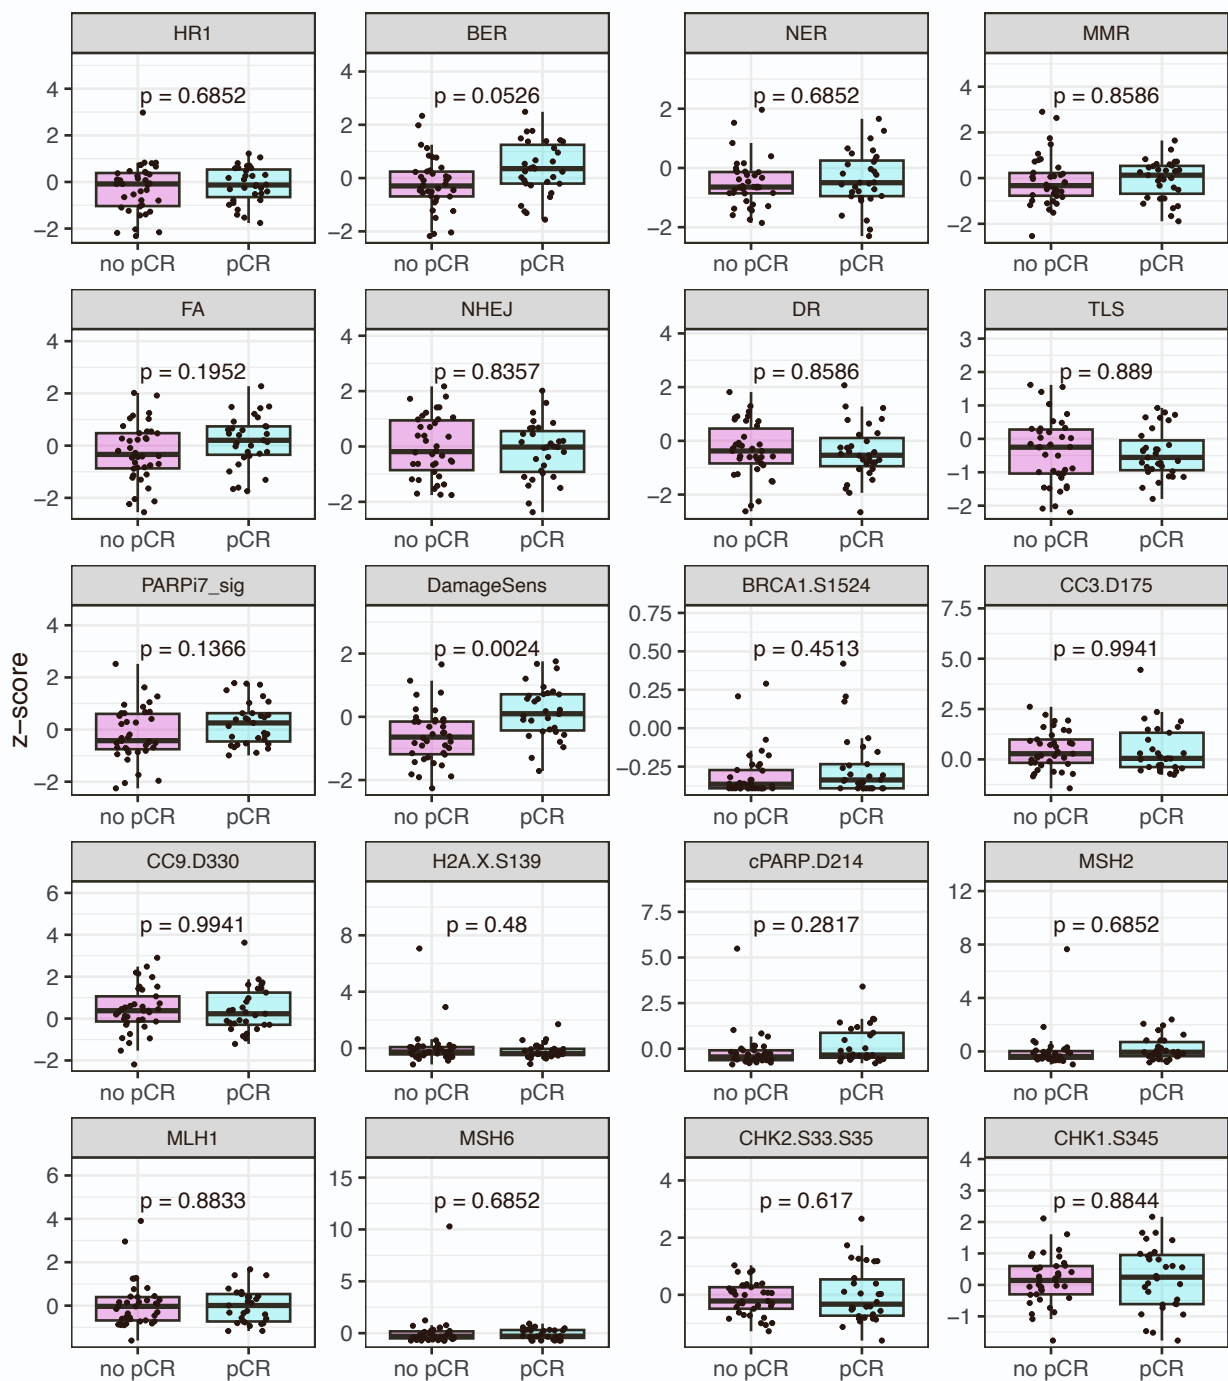

**Figure S7. Associations of DNA damage and repair biomarkers with response to ICB. Related to Figure 6 and Tables S2, S3, and S6.** Boxplots illustrating the associations of DNA damage and repair biomarkers measured by gene expression or RPPA with response. Descriptions of gene signatures are given in Table S2. Descriptions of RPPA markers are given in Table S3. The data are depicted as individual dots for each sample, along with the median, first and third quartile. Statistical analysis was performed using the likelihood-ratio test. BH corrected p values shown.



**Supplemental Table S1. Details of primary antibodies and Opal fluorophores used in mIF. Related to Figure 2 and STAR Methods.**

| <b>Panel 1</b>                          |              |                        |                 |             |
|-----------------------------------------|--------------|------------------------|-----------------|-------------|
| <u>Marker</u>                           | <u>Clone</u> | <u>Antibody source</u> | <u>Opal TSA</u> | <u>RRID</u> |
| FoxP3; regulatory T cell marker         | SP97         | Spring Biosciences     | 620             | AB_10658507 |
| pan-cytokeratin; epithelial cell marker | AE1/AE3      | Dako                   | 650             | AB_2631307  |
| CD20; B lymphocyte marker               | L26          | Ventana/Roche          | 540             | AB_2335956  |
| CD3; T lymphocyte marker                | 2GV6         | Ventana/Roche          | 520             | AB_2335978  |
| Ki67; proliferation marker              | 30-9         | Ventana/Roche          | 570             | AB_2631262  |
| CD117; c-Kit, mast cells                | D3W6Y        | Cell Signaling         | 690             | AB_2799120  |
| <b>Panel 2</b>                          |              |                        |                 |             |
| <u>Marker</u>                           | <u>Clone</u> | <u>Antibody source</u> | <u>Opal TSA</u> | <u>RRID</u> |
| PD-L1; immune checkpoint                | E1L3N        | Cell Signaling         | 620             | AB_2687655  |
| PD-1; immune checkpoint                 | EPR4877      | Abcam                  | 650             | AB_2894867  |
| CD8; cytotoxic T cell marker            | 4B11         | Leica                  | 690             | AB_442068   |
| pan-cytokeratin; epithelial cell marker | AE1/AE3      | Dako                   | 570             | AB_2631307  |
| CD68; macrophage marker                 | PG-M1        | Dako                   | 540             | AB_2074844  |
| CD3; T cell marker                      | 2GV6         | Ventana/Roche          | 520             | AB_2335978  |

**Supplemental Table S3. Reverse Phase Protein Array (RPPA) based biomarkers evaluated in this study. Related to Figures 3, 6, S2, S3, S6, S7, Table S6, and STAR Methods. DDR: DNA Damage Response.**

| Biomarker        | Type             | Description                                                       |
|------------------|------------------|-------------------------------------------------------------------|
| CD3ε             | cell population  | CD3 epsilon chain                                                 |
| CD3ζ             | cell population  | CD3 zeta chain                                                    |
| HLADR            | cell population  | MHC class II molecule; HLA-DR                                     |
| HLADRPQX         | cell population  | MHC class II molecules; HLA-DR, HLA-DP, HLA-DQ, HLA-DX            |
| 28.8             | cell population  | PD-L1 (antibody clone 28.8)                                       |
| Atezo            | cell population  | PD-L1 (atezolizumab)                                              |
| SP142            | cell population  | PD-L1 (antibody clone SP142)                                      |
| E1L3N            | cell population  | PD-L1 (antibody clone E1L3N)                                      |
| 22C3             | cell population  | PD-L1 (antibody clone 22C3)                                       |
| Pembro           | cell population  | PD-1 (pembrolizumab)                                              |
| Nivo             | cell population  | PD-1 (nivolumab)                                                  |
| STAT1.Y701       | Immune signaling | Phospho-STAT1; signal transducer and activator of transcription 1 |
| STAT3.S727       | Immune signaling | Phospho-STAT3; signal transducer and activator of transcription 3 |
| STAT3.Y705       | Immune signaling | Phospho-STAT3; signal transducer and activator of transcription 3 |
| JAK1.Y1022.Y1023 | Immune signaling | Phospho-JAK1; Janus kinase 1                                      |
| JAK2.Y1007.Y1008 | Immune signaling | Phospho-JAK2; Janus kinase 2                                      |
| TYK2.Y1054.Y1055 | Immune signaling | Phospho-TYK2; JAK family non-receptor tyrosine protein-kinase     |
| BRCA1.S1524      | DDR              | Phospho-BRCA1; breast cancer type 1 susceptibility protein        |
| CC3.D175         | DDR              | Phospho-CC3; cleaved caspase 3                                    |
| CC9.D330         | DDR              | Phospho-CC9; cleaved caspase 9                                    |
| H2A.X.S139       | DDR              | Phospho-H2A.X; H2A histone family member X                        |
| cPARP.D214       | DDR              | Phospho-cleaved PARP; poly (ADP-ribose) polymerase                |
| MSH2             | DDR              | MutS homolog 2, DNA mismatch repair protein                       |
| MSH6             | DDR              | MutS homolog 6, DNA mismatch repair protein                       |
| MLH1             | DDR              | MutL homolog 1, DNA mismatch repair protein                       |
| CHK1.S345        | DDR              | Phospho-CHK1, checkpoint kinase 1                                 |
| CHK2.S33.S35     | DDR              | Phospho-CHK2, checkpoint kinase 2                                 |

**Table S4. mIF based biomarkers evaluated in this study. Related to Figures 3, 4, 5, S2, S3, S4, S5, Table S5, and STAR Methods.**

| <u>Biomarker</u> | <u>Type</u>         | <u>Description</u>                                                                     |
|------------------|---------------------|----------------------------------------------------------------------------------------|
| Tcell            | cell population     | T cells (CD3+)                                                                         |
| Treg             | cell population     | Regulatory T cells (CD3+Foxp3+)                                                        |
| Bcell            | cell population     | B cells (CD20+)                                                                        |
| Mast             | cell population     | Mast cells (CD117+ CK-)                                                                |
| TIL              | cell population     | Tumor infiltrating lymphocytes (Tcell + Bcell)                                         |
| Tc               | cell population     | Cytotoxic T cells (CD8+CD3+)                                                           |
| CD8nT            | cell population     | CD8-negative T cells (CD8-CD3+)                                                        |
| Mac              | cell population     | Macrophages (CD68+CK-)                                                                 |
| prT              | cell population     | proliferating T cells (Ki67+CD3+)                                                      |
| prB              | cell population     | proliferating B cells (Ki67+CD20+)                                                     |
| prTum            | cell population     | proliferating tumor cells (Ki67+CK+)                                                   |
| PD1CD8T          | cell population     | PD-1 positive cytotoxic T cells (PD-1+ CD8+ CD3+)                                      |
| PD1CD8nT         | cell population     | PD-1 positive CD8 negative T cells (PD-1+ CD8- CD3+)                                   |
| PD1T             | cell population     | PD-1 positive T cells (PD-1+ CD3+)                                                     |
| PD1Im            | cell population     | PD-1 positive immune cells (PD-1+ CK-)                                                 |
| PDL1Mac          | cell population     | PD-L1 positive macrophages (PD-L1+ CD68+ CK-)                                          |
| PDL1Im           | cell population     | PD-L1 positive immune cells (PD-L1+ CK-)                                               |
| PDL1Tum          | cell population     | PD-L1 positive tumor cells (PD-L1+ CK+)                                                |
| CPS              | immune score        | PDL1 combined positive score: $[(PDL1Im + PDL1Tum) / (\text{tumor cell count})] * 100$ |
| TPS              | immune score        | PDL1 tumor proportion score: $[(PDL1Tum) / (\text{tumor cell count})] * 100$           |
| T_Treg           | Morisita-Horn index | colocalization of non-Treg T cells & Treg                                              |
| T_B              | Morisita-Horn index | colocalization of T cells & B cells                                                    |
| Tm_B             | Morisita-Horn index | colocalization of tumor cells & B cells                                                |
| Tm_Treg          | Morisita-Horn index | colocalization of tumor cells & Treg                                                   |
| Tm_T             | Morisita-Horn index | colocalization of tumor cells & T cells                                                |
| Tm_TIL           | Morisita-Horn index | colocalization of tumor cells & TIL                                                    |
| Tm_CD8nT         | Morisita-Horn index | colocalization of tumor cells & CD8- T cells                                           |
| Tm_Tc            | Morisita-Horn index | colocalization of tumor cells & CD8+ cytotoxic T cells                                 |
| Tm_Mac           | Morisita-Horn index | colocalization of tumor cells & macrophages                                            |
| CD8nT_Mac        | Morisita-Horn index | colocalization of CD8- T cells & macrophages                                           |
| Tc_Mac           | Morisita-Horn index | colocalization of CD8+ cytotoxic T cells & macrophages                                 |
| T_Mac            | Morisita-Horn index | colocalization of T cells & macrophages                                                |

| <u>Biomarker</u>    | <u>Type</u>             | <u>Description</u>                                                           |
|---------------------|-------------------------|------------------------------------------------------------------------------|
| PD1T_PDL1Tm         | Morisita-Horn index     | colocalization of PD-1+ T cells & PD-L1+ tumor cells                         |
| PD1Tc_PDL1Tm        | Morisita-Horn index     | colocalization of PD-1+ cytotoxic T cells & PD-L1+ tumor cells               |
| CD8nPD1T_PDL1Tm     | Morisita-Horn index     | colocalization of CD8- PD-1+ T cells & PD-L1+ tumor cells                    |
| PD1T_PDL1Im         | Morisita-Horn index     | colocalization of PD-1+ T cells & PD-L1+ immune cells                        |
| PD1Tc_PDL1Im        | Morisita-Horn index     | colocalization of PD-1+ cytotoxic T cells & PD-L1+ immune cells              |
| CD8nPD1T_PDL1Im     | Morisita-Horn index     | colocalization of CD8- PD-1+ T cells & PD-L1+ immune cells                   |
| PD1T_PDL1           | Morisita-Horn index     | colocalization of PD-1+ T cells & any PD-L1+ cell                            |
| PD1Tc_PDL1          | Morisita-Horn index     | colocalization of PD-1+ cytotoxic T cells & any PD-L1+ cell                  |
| CD8nPD1T_PDL1       | Morisita-Horn index     | colocalization of CD8- PD-1+ T cells & any PD-L1+ cell                       |
| Tm_B.SPS            | Spatial Proximity Score | SPS score for tumor cells with a B cell within 20 um                         |
| Tm_T.SPS            | Spatial Proximity Score | SPS score for tumor cells with a T cell within 20 um                         |
| Tm_Treg.SPS         | Spatial Proximity Score | SPS score for tumor cells with a Treg cell within 20 um                      |
| T_Treg.SPS          | Spatial Proximity Score | SPS score for T cells with a Treg cell within 20 um                          |
| T_B.SPS             | Spatial Proximity Score | SPS score for T cells with a B cell within 20 um                             |
| Tm_CD8nT.SPS        | Spatial Proximity Score | SPS score for tumor cells with a CD8- T cell within 20 um                    |
| Tm_Tc.SPS           | Spatial Proximity Score | SPS score for tumor cells with a cytotoxic T cell within 20 um               |
| Tm_Mac.SPS          | Spatial Proximity Score | SPS score for tumor cells with a macrophage within 20 um                     |
| T_Mac.SPS           | Spatial Proximity Score | SPS score for T cells with a macrophage within 20 um                         |
| CD8nT_Mac.SPS       | Spatial Proximity Score | SPS score for CD8- T cells with a macrophage within 20 um                    |
| Tc_Mac.SPS          | Spatial Proximity Score | SPS score for cytotoxic T cells with a macrophage within 20 um               |
| PD1T_PDL1Tm.SPS     | Spatial Proximity Score | SPS score for PD-1+ T cells with a PD-L1+ tumor cell within 20 um            |
| PD1Tc_PDL1Tm.SPS    | Spatial Proximity Score | SPS score for PD-1+ cytotoxic T cells with a PD-L1+ tumor cell within 20 um  |
| CD8nPD1T_PDL1Tm.SPS | Spatial Proximity Score | SPS score for CD8- PD-1+ T cells with a PD-L1+ tumor cell within 20 um       |
| PD1T_PDL1Im.SPS     | Spatial Proximity Score | SPS score for PD-1+ T cells with a PD-L1+ immune cell within 20 um           |
| PD1Tc_PDL1Im.SPS    | Spatial Proximity Score | SPS score for PD-1+ cytotoxic T cells with a PD-L1+ immune cell within 20 um |
| CD8nPD1T_PDL1Im.SPS | Spatial Proximity Score | SPS score for CD8- PD-1+ T cells with a PD-L1+ immune cell within 20 um      |
| PD1T_PDL1.SPS       | Spatial Proximity Score | SPS score for PD-1+ T cells with any PD-L1+ cell within 20 um                |
| PD1Tc_PDL1.SPS      | Spatial Proximity Score | SPS score for PD-1+ cytotoxic T cells with any PD-L1+ cell within 20 um      |
| CD8nPD1T_PDL1.SPS   | Spatial Proximity Score | SPS score for CD8- PD-1+ T cells with any PD-L1+ cell within 20 um           |
